# Supplementary material for: Circulating extracellular vesicles in Systemic Lupus Erythematosus: physicochemical properties and phenotype
Source: PubMed Central journal article supplement — Lupus Sci Med. 2024 Aug 17;11(2):e001243. doi: 10.1136/lupus-2024-001243 (PMC11331945; doi:10.1136/lupus-2024-001243), 2024-08-17
Supplement: lupus-11-2-s001.pdf [file lupus-11-2-s001.pdf]

**Supplementary Table 1. Reagents and equipment used for flow cytometry analysis.**

| <b>Fluorochrome</b>                                   | <b>Marker</b>                            | <b>Clone</b> | <b>Company</b>         |
|-------------------------------------------------------|------------------------------------------|--------------|------------------------|
| Alexa Fluor 700                                       | Anti-human CD45                          | HI30         | BD Biosciences         |
| PE-Cy7                                                | Anti-human CD235a                        | GA-R2 (HIR2) | BD Biosciences         |
| BV650                                                 | Anti-human HLA-DR                        | G46-6        | BD Biosciences         |
| PerCP-Cy5                                             | Anti-human CD63                          | H5C6         | BD Biosciences         |
| APC                                                   | Anti-human HMGB1                         | 115603       | R&D                    |
| PE                                                    | Anti-human CD14                          | M5E2         | Biologend              |
| FITC                                                  | Anti-human CD16                          | 3G8          | BD Biosciences         |
| Alexa Fluor 488                                       | Anti-human C4d                           | SPM545       | Thermo Scientific      |
| Alexa Fluor 488                                       | F(ab') <sub>2</sub> anti-IgG<br>fragment | Polyclonal   | Jackson ImmunoResearch |
| AlexaFluor 647                                        | F(ab') <sub>2</sub> anti-IgM<br>fragment | Polyclonal   | Jackson ImmunoResearch |
| FITC                                                  | Annexin V                                | –            | BD Biosciences         |
| Annexin V binding buffer                              |                                          |              | BD Biosciences         |
| Flow Cytometry Sub-Micron Particle Size Reference Kit |                                          |              | Invitrogen             |
| Gigamix (Megamix-Plus SSC and Megamix-Plus FSC) beads |                                          |              | BioCytex               |
| <b>Intruments</b>                                     |                                          |              | <b>Company</b>         |
| LSRFortessa flow cytometer                            |                                          |              | Beckton Dickinson      |
| CytoFLEX instrument                                   |                                          |              | Beckman Coulter        |
| Sorvall Legend microcentrifuge                        |                                          |              | Thermo Scientific      |

**Supplementary Table 2. Equipment used for Electron Microscopy analysis.**

| <b>Instrument and materials</b>                            | <b>Company</b> |
|------------------------------------------------------------|----------------|
| Tecnai F20 Super Twin TMP transmission electron microscope | FEI            |
| JEOL JSM-6490 LV scanning electron microscope              | CIQTEK         |
| Lacey carbon-coated electron microscopy grids              | Sigma-Aldrich  |

**Supplementary Table 3. Equipment used for Dinamic Litgh Scattering analysis.**

| <b>Instrument and materials</b> | <b>Company</b>      |
|---------------------------------|---------------------|
| Zetasizer Pro                   | Malvern Panalytical |
| cuvette Zeta DTS1070            | Malvern Panalytical |
