# Supplementary material for: Circulating extracellular vesicles in Systemic Lupus Erythematosus: physicochemical properties and phenotype
Source: PubMed Central journal article supplement — Lupus Sci Med. 2024 Aug 17;11(2):e001243. doi: 10.1136/lupus-2024-001243 (PMC11331945; doi:10.1136/lupus-2024-001243), 2024-08-17
Supplement: lupus-11-2-s002.pdf [file lupus-11-2-s002.pdf]

Supplementary Table 2. Clinical characteristics of LN subgroup.

| <b>Clinical characteristics of LN patients</b>                     |                           | <b>n=21</b>           |
|--------------------------------------------------------------------|---------------------------|-----------------------|
| <b>Age, years (Median, SD)</b>                                     |                           | 33 ( $\pm$ 9,7)       |
| <b>Creatinine mg/dL (Median, SD)</b>                               |                           | 0,83<br>( $\pm$ 0,18) |
| <b>Time between biopsy and blood sampling, months (Median, SD)</b> |                           | 13 ( $\pm$ 41,8)      |
| <b>Activity index (Median, SD)</b>                                 |                           | 10( $\pm$ 3,1)        |
| <b>Chronicity Index (Media, range)</b>                             |                           | 1( $\pm$ 1)           |
| <b>Histopathological classification</b>                            | <b>II (n,%)</b>           | 1 (4,7)               |
|                                                                    | <b>III (n,%)</b>          | 2 (10,5)              |
|                                                                    | <b>IV (n,%)</b>           | 10 (47,6)             |
|                                                                    | <b>V (n,%)</b>            | 2 (10,5)              |
|                                                                    | <b>Mixed (n,%)</b>        | 6 (28,5)              |
| <b>Therapy</b>                                                     | <b>Induction (n, %)</b>   | 4 (22)                |
|                                                                    | <b>Maintenance (n, %)</b> | 17 (88)               |
